# Supplementary material for: On the comparison of oxygen and sulfur transfer reactivities in phosphine and phosphorene: the case of R3Sb(X) carriers (X = O or S)
Source: Royal Society of Chemistry journal article supplement (doi:10.1039/d0dt02860f), 2020-01-01
Supplement: d0dt02860f1.pdf [file d0dt02860f1.pdf]

# **On the comparison of Oxygen and Sulfur Transfer Reactivity in Phosphine and Phosphorene: the case of $R_3Sb(X)$ carriers ( $X = O, S$ )**

**Supporting Information**

# List of Coordinates and Energy parameters of Optimized Structures

## Compound Me<sub>3</sub>P

### CARTESIAN COORDINATES

P 2.622179125770E+00 -2.918500162106E-01 4.811386818999E-01  
C 3.113386681743E+00 1.493159421001E+00 3.069115240605E-01  
H 3.091508379068E+00 1.981242759116E+00 1.280783468561E+00  
H 4.109808682748E+00 1.621288035905E+00 -1.184036052970E-01  
H 2.399598075984E+00 2.014114410628E+00 -3.304980217765E-01  
C 3.022460747118E+00 -8.643738782265E-01 -1.242198136185E+00  
H 2.302919146679E+00 -4.498343629051E-01 -1.947652189506E+00  
H 4.023948484370E+00 -5.764014752030E-01 -1.565108294542E+00  
H 2.942626575417E+00 -1.949420760220E+00 -1.300981774763E+00  
C 4.142608330359E+00 -9.201485608405E-01 1.348014383744E+00  
H 4.170247427719E+00 -5.425741175952E-01 2.369744257285E+00  
H 4.113469855065E+00 -2.007755468631E+00 1.407281960405E+00  
H 5.068401362234E+00 -6.287331285424E-01 8.497979280683E-01

### Energy parameters

|                   | AU                  | EV                  | KJ/MOL            |
|-------------------|---------------------|---------------------|-------------------|
| Electronic Energy | : -460.987483460195 | -12544.107155036518 | -1210322.46725937 |
| Free Energy       | : -460.901692277723 | -12541.772658277941 | -1210097.22254154 |

## Compound Me<sub>3</sub>P(O)

### CARTESIAN COORDINATES

P 3.342664684886E+00 2.195768599010E-02 2.512356080023E-02  
C 4.000277586080E+00 7.973361351777E-02 -1.679604081297E+00  
H 3.677071244909E+00 1.003643496861E+00 -2.155024045129E+00  
H 5.088671986478E+00 2.808962914716E-02 -1.704338906389E+00  
H 3.591662201476E+00 -7.537025220743E-01 -2.247517078038E+00  
C 4.038291696608E+00 -1.505073884947E+00 7.504384556366E-01  
H 3.629540784587E+00 -2.366700657807E+00 2.263657503743E-01  
H 5.126061107591E+00 -1.533409169725E+00 6.883800783676E-01  
H 3.739722493852E+00 -1.571570478885E+00 1.794731930632E+00  
C 4.180569417345E+00 1.388759983873E+00 9.035220579293E-01  
H 3.861302104986E+00 2.336527837585E+00 4.746491998566E-01  
H 3.883931958040E+00 1.374298503884E+00 1.950405512445E+00  
H 5.266207323377E+00 1.316536850044E+00 8.398025040093E-01  
O 1.826725409788E+00 9.280911253509E-02 9.506506080280E-02

### Energy parameters

|                   | AU                  | EV                  | KJ/MOL            |
|-------------------|---------------------|---------------------|-------------------|
| Electronic Energy | : -536.240378145704 | -14591.842524283718 | -1407898.91441260 |
| Free Energy       | : -536.151971345888 | -14589.436852958781 | -1407666.80239240 |

**Compound Me<sub>3</sub>P(S)****CARTESIAN COORDINATES**

P 3.343173472502E+00 2.127320517556E-02 2.456446413703E-02  
C 4.035836966957E+00 7.772643651731E-02 -1.673106513903E+00  
H 3.722824254289E+00 1.000975736971E+00 -2.154902815693E+00  
H 5.124490729705E+00 2.415666887213E-02 -1.667392129672E+00  
H 3.636907083886E+00 -7.544530326812E-01 -2.248282585788E+00  
C 4.073127194360E+00 -1.499425568101E+00 7.454811667455E-01  
H 3.675912215907E+00 -2.366954886396E+00 2.238455378249E-01  
H 5.160606743892E+00 -1.499950779376E+00 6.716146399574E-01  
H 3.782739749704E+00 -1.572790396555E+00 1.790841029261E+00  
C 4.211629132719E+00 1.380835087373E+00 8.977419299623E-01  
H 3.901611810977E+00 2.332426789693E+00 4.724573235640E-01  
H 3.924543861672E+00 1.371071152980E+00 1.946547589790E+00  
H 5.294509984660E+00 1.285283434095E+00 8.185742924010E-01  
S 1.364786798768E+00 1.117261514318E-01 1.140160714124E-01

**Energy parameters**

|                   | AU                  | EV                  | KJ/MOL            |
|-------------------|---------------------|---------------------|-------------------|
| Electronic Energy | : -859.043000032074 | -23375.748430958974 | -2255417.07873830 |
| Free Energy       | : -858.956900075270 | -23373.405532023658 | -2255191.02333357 |

**Compound Me<sub>3</sub>Sb****CARTESIAN COORDINATES**

Sb -1.241281972613E+00 1.950678707781E-01 -2.542118692393E-01  
C -2.365857322454E+00 5.508818516254E-01 1.579916878023E+00  
H -2.218153455969E+00 1.574966611578E+00 1.916348674878E+00  
H -3.426879761611E+00 3.837375343386E-01 1.411111882832E+00  
H -2.022897698100E+00 -1.193428594692E-01 2.365449446852E+00  
C -2.242783057160E+00 -1.695195033952E+00 -6.773073233818E-01  
H -1.891703283491E+00 -2.465664496463E+00 5.901914868889E-03  
H -3.318647136658E+00 -1.586462275180E+00 -5.646428162741E-01  
H -2.024172743097E+00 -2.015037434888E+00 -1.693991895953E+00  
C -2.604140582277E+00 1.364056354552E+00 -1.491720585001E+00  
H -2.470795696538E+00 2.425750670834E+00 -1.294989732638E+00  
H -2.400773756767E+00 1.183907339722E+00 -2.545324122874E+00  
H -3.635143533263E+00 1.091962866524E+00 -1.279194452092E+00

**Energy parameters**

|                   | AU                  | EV                 | KJ/MOL           |
|-------------------|---------------------|--------------------|------------------|
| Electronic Energy | : -359.883597204997 | -9792.930542916329 | -944874.25130479 |
| Free Energy       | : -359.805155132779 | -9790.796025614520 | -944668.30167320 |

**Compound Me<sub>3</sub>Sb(O)****CARTESIAN COORDINATES**

Sb -1.541105129724E+00 1.665203323776E-01 -2.409874149963E-01  
C -2.392366626724E+00 5.776782666045E-01 1.687594952666E+00  
H -2.160864083787E+00 1.601334257515E+00 1.968911525474E+00  
H -3.471401406571E+00 4.420236538433E-01 1.661609311785E+00  
H -1.958254496533E+00 -9.695033756629E-02 2.420428369260E+00  
C -2.260628017176E+00 -1.803104350723E+00 -7.057366455951E-01  
H -1.823867032067E+00 -2.515583934701E+00 -1.129025534104E-02  
H -3.345218863997E+00 -1.837535928957E+00 -6.291051070495E-01  
H -1.958637747568E+00 -2.064075458989E+00 -1.716321605693E+00  
C -2.648631238633E+00 1.440315262555E+00 -1.569134312784E+00  
H -2.421907947292E+00 2.477947881806E+00 -1.339859402952E+00  
H -2.351811663884E+00 1.231764339933E+00 -2.593357332672E+00  
H -3.716707848490E+00 1.267221162383E+00 -1.456763308408E+00  
O 3.109011024482E-01 3.635448539180E-01 -3.351897736937E-01

**Energy parameters**

|                   | AU                  | EV                  | KJ/MOL            |
|-------------------|---------------------|---------------------|-------------------|
| Electronic Energy | : -435.055480023541 | -11838.461467191619 | -1142238.00183128 |
| Free Energy       | : -434.976491525990 | -11836.312080900569 | -1142030.61756019 |

**Compound Me<sub>3</sub>Sb(S)****CARTESIAN COORDINATES**

Sb -1.531881823336E+00 1.658992588578E-01 -2.407912977670E-01  
C -2.423419406440E+00 5.715986883935E-01 1.676895508808E+00  
H -2.216813805860E+00 1.602116903515E+00 1.951511315074E+00  
H -3.498074750330E+00 4.108942522992E-01 1.629666190042E+00  
H -1.983829237160E+00 -8.897906722802E-02 2.418685090000E+00  
C -2.294472554227E+00 -1.794268371289E+00 -7.025073810076E-01  
H -1.866460071815E+00 -2.513239892800E+00 -9.722579282889E-03  
H -3.378840425167E+00 -1.801261819012E+00 -6.187419987280E-01  
H -2.001170249041E+00 -2.057839820166E+00 -1.714701644227E+00  
C -2.676488069640E+00 1.428290748274E+00 -1.557160440388E+00  
H -2.458219455344E+00 2.467684096538E+00 -1.328652241851E+00  
H -2.388816633500E+00 1.221858751946E+00 -2.584186175545E+00  
H -3.739072095175E+00 1.236689665475E+00 -1.425695274426E+00  
S 7.170575770357E-01 4.016566051952E-01 -3.538000707013E-01

**Energy parameters**

|                   | AU                  | EV                  | KJ/MOL            |
|-------------------|---------------------|---------------------|-------------------|
| Electronic Energy | : -757.908760856828 | -20623.745873894070 | -1989889.17120336 |
| Free Energy       | : -757.831456978054 | -20621.642328410428 | -1989686.20989824 |

**Compound [Me<sub>3</sub>P-O-SbMe<sub>3</sub>]<sub>TS</sub>****CARTESIAN COORDINATES**

P 2.626730754270E+00 -2.731758741145E-01 4.527853926458E-01  
C 3.107641092633E+00 1.504436796864E+00 3.158903091174E-01  
H 3.050521686668E+00 1.979232020649E+00 1.294617328720E+00  
H 4.120398489073E+00 1.635062201255E+00 -7.017877006614E-02  
H 2.405994841122E+00 2.013481232640E+00 -3.395063281511E-01  
C 3.016990510324E+00 -8.780325553710E-01 -1.248415802521E+00  
H 2.318786486801E+00 -4.342171694484E-01 -1.953191304371E+00  
H 4.036660087522E+00 -6.370562386394E-01 -1.554473824614E+00  
H 2.892388850674E+00 -1.959241261877E+00 -1.294765518391E+00  
C 4.156399833403E+00 -9.132225414525E-01 1.337978891276E+00  
H 4.178767402140E+00 -5.359825718999E-01 2.359837969335E+00  
H 4.125160676118E+00 -2.000898079925E+00 1.394145507353E+00  
H 5.086722163527E+00 -6.216731004059E-01 8.441063316208E-01  
Sb -1.393772702934E+00 2.228012739230E-01 -2.404605260492E-01  
C -2.453783034243E+00 5.330863991299E-01 1.619065560981E+00  
H -2.312726872009E+00 1.556458030160E+00 1.957573364792E+00  
H -3.516993189726E+00 3.409141810127E-01 1.491930571143E+00  
H -2.048448022925E+00 -1.403853184026E-01 2.369272053793E+00  
C -2.231166257571E+00 -1.697956310307E+00 -7.832617101251E-01  
H -1.820727472717E+00 -2.458521565056E+00 -1.245347589037E-01  
H -3.315075520534E+00 -1.682848674641E+00 -6.914360957105E-01  
H -1.962465618110E+00 -1.942712649029E+00 -1.807914140982E+00  
C -2.646628092062E+00 1.485433875371E+00 -1.530988548662E+00  
H -2.498826065183E+00 2.532620799334E+00 -1.278906599763E+00  
H -2.378314688126E+00 1.330685585382E+00 -2.573163506827E+00  
H -3.692008286957E+00 1.220923341353E+00 -1.382721035604E+00  
O 5.731729488213E-01 -1.701182650455E-02 2.007151899645E-01

**Imaginary Frequency -371.2 cm<sup>-1</sup>****Energy parameters**

|                   | AU                  | EV                  | KJ/MOL            |
|-------------------|---------------------|---------------------|-------------------|
| Electronic Energy | : -896.018768814362 | -24381.910251803554 | -2352496.94599516 |
| Free Energy       | : -895.839768962245 | -24377.039418199081 | -2352026.98194966 |

**Compound [Me<sub>3</sub>P-S-SbMe<sub>3</sub>]<sub>TS</sub>****CARTESIAN COORDINATES**

P 3.255985609709E+00 3.418925259029E-02 3.668512736757E-02  
C 4.009952531775E+00 8.246805764840E-02 -1.649393950852E+00  
H 3.728167485624E+00 1.008164188412E+00 -2.147328197417E+00  
H 5.098438536583E+00 1.351303033877E-02 -1.624618775188E+00  
H 3.618970942028E+00 -7.408039451208E-01 -2.244048695321E+00  
C 4.050260629938E+00 -1.477639036890E+00 7.433393947409E-01  
H 3.663148227066E+00 -2.360253477222E+00 2.370641864662E-01  
H 5.136945268012E+00 -1.464638429250E+00 6.467822218682E-01

H 3.792755227833E+00 -1.565544952456E+00 1.797722609386E+00  
 C 4.202535267795E+00 1.372945958889E+00 8.938808387394E-01  
 H 3.917918412065E+00 2.340494654951E+00 4.839320368291E-01  
 H 3.949230444037E+00 1.377985970596E+00 1.952626757407E+00  
 H 5.282407180123E+00 1.253348786962E+00 7.924154877234E-01  
 S 6.635117234773E-01 3.925106944605E-02 4.618917702937E-02  
 Sb -1.798897712294E+00 -1.656661631202E-02 -6.372970591939E-03  
 C -2.803463147818E+00 -1.882681132266E+00 -4.791056741990E-01  
 H -2.530690866337E+00 -2.636616085678E+00 2.547876635016E-01  
 H -3.881783768811E+00 -1.740239113917E+00 -4.697066909842E-01  
 H -2.491097816895E+00 -2.223174155096E+00 -1.462903066391E+00  
 C -2.857383367561E+00 1.264347486476E+00 -1.404780080186E+00  
 H -3.929962907245E+00 1.104992461907E+00 -1.320144962367E+00  
 H -2.626981942712E+00 2.304356591621E+00 -1.188803672551E+00  
 H -2.535417151606E+00 1.038021873547E+00 -2.417949545470E+00  
 C -2.920243446480E+00 4.905444432039E-01 1.783706443888E+00  
 H -2.653073022895E+00 -1.941686661651E-01 2.584672055815E+00  
 H -2.672048453818E+00 1.503057991737E+00 2.091642724196E+00  
 H -3.988183881593E+00 4.215437920485E-01 1.587909556562E+00

### Imaginary Frequency -195.3 cm<sup>-1</sup>

#### Energy parameters

|                   | AU                   | EV                  | KJ/MOL            |
|-------------------|----------------------|---------------------|-------------------|
| Electronic Energy | : -1218.888856227799 | -33167.651988802121 | -3200192.24103721 |
| Free Energy       | : -1218.706195438981 | -33162.681536045435 | -3199712.66520375 |

#### Phosphorene, P<sub>32</sub>

##### Structural parameters

CELL 13.4084 9.4216 1.0000 90.0000 90.0000 89.9991  
 P 0.125013 0.048969 1.094710  
 P 0.000010 0.207075 1.095071  
 P -0.000001 0.298943 -1.024535  
 P 0.125020 0.456996 -1.026541  
 P -0.124987 0.048976 1.094446  
 P 0.250008 0.207067 1.095007  
 P 0.250057 0.298937 -1.024555  
 P -0.124981 0.457070 -1.024263  
 P 0.125028 -0.451087 1.092936  
 P 0.000066 -0.292970 1.094806  
 P 0.000025 -0.201023 -1.024596  
 P 0.125024 -0.042946 -1.024781  
 P -0.124970 -0.451024 1.095266  
 P 0.250007 -0.292973 1.094843  
 P 0.250017 -0.201025 -1.024568  
 P -0.124972 -0.042944 -1.025031  
 P -0.374984 0.048963 1.094489  
 P -0.499980 0.207047 1.094624  
 P -0.499977 0.298965 -1.024818

P -0.374992 0.457073 -1.024374  
 P 0.375002 0.048964 1.094588  
 P -0.249989 0.207051 1.094600  
 P -0.249984 0.299004 -1.024791  
 P 0.375008 0.457062 -1.024300  
 P -0.374972 -0.451023 1.095121  
 P -0.499977 -0.292927 1.094740  
 P -0.499980 -0.201033 -1.024803  
 P -0.374976 -0.042947 -1.025002  
 P 0.375041 -0.451035 1.095242  
 P -0.249980 -0.292922 1.094636  
 P -0.249954 -0.201042 -1.024942  
 P 0.375030 -0.042941 -1.024923

### Energy parameters

|                   | AU/CELL               | EV/CELL              | KJ/MOL             |
|-------------------|-----------------------|----------------------|--------------------|
| Electronic Energy | : -10922.336784611631 | -297211.893869990308 | -28676591.18673322 |
| Free Energy       | : -10922.306010131868 | -297211.056453822530 | -28676510.38834799 |

### Phosphorene oxide, P<sub>32</sub>O

#### Structural parameters

CELL 13.4200 9.4427 1.0000 90.0000 90.0000 90.0002  
 P 0.125006 0.057845 0.952625  
 P -0.003659 0.210610 1.118689  
 P 0.000583 0.301095 -1.008276  
 P 0.125006 0.459896 -0.981918  
 P -0.126254 0.048749 1.109733  
 P 0.253677 0.210601 1.118796  
 P 0.249428 0.301095 -1.008153  
 P -0.125641 0.457071 -1.044007  
 P 0.125004 -0.449977 1.148880  
 P -0.001534 -0.293390 1.170889  
 P -0.000843 -0.202619 -0.959885  
 P 0.125007 -0.047218 -1.086366  
 P -0.125454 -0.452891 1.073908  
 P 0.251542 -0.293393 1.170844  
 P 0.250856 -0.202622 -0.959947  
 P -0.124638 -0.043326 -1.006863  
 P -0.374992 0.049160 1.093956  
 P -0.499459 0.207273 1.094330  
 P -0.499982 0.297867 -1.032191  
 P -0.374995 0.455688 -1.038690  
 P 0.376270 0.048740 1.109710  
 P -0.250527 0.207277 1.094331  
 P -0.250007 0.297869 -1.032202  
 P 0.375652 0.457069 -1.043901

P -0.374995 -0.452014 1.080886  
 P 0.499999 -0.294774 1.090544  
 P 0.499983 -0.200840 -1.021443  
 P -0.374993 -0.043093 -1.023194  
 P 0.375465 -0.452889 1.074001  
 P -0.249986 -0.294777 1.090533  
 P -0.249970 -0.200839 -1.021435  
 P 0.374652 -0.043328 -1.006903  
 O 0.124999 -0.047114 2.112919

### Energy parameters

|                     | AU/CELL             | EV/CELL              | KJ/MOL             |
|---------------------|---------------------|----------------------|--------------------|
| Electronic Energy : | -10997.555842865309 | -299258.708503118076 | -28874078.79634720 |
| Free Energy :       | -10997.522772082795 | -299257.808601375727 | -28873991.96901995 |

### Phosphorene sulphide, P<sub>32</sub>S

#### Structural parameters

CELL 13.4160 9.4970 1.0000 90.0000 90.0000 89.9994  
 P 0.125008 0.063633 1.096371  
 P -0.004873 0.214700 1.082940  
 P 0.000263 0.299619 -1.057731  
 P 0.125001 0.457683 -1.028091  
 P -0.126018 0.051148 1.111413  
 P 0.254886 0.214698 1.083006  
 P 0.249745 0.299623 -1.057643  
 P -0.126172 0.455002 -1.090449  
 P 0.125007 -0.455128 1.112246  
 P -0.002364 -0.300690 1.167911  
 P -0.000177 -0.202293 -0.926360  
 P 0.125007 -0.047231 -0.930963  
 P -0.126628 -0.457300 1.035578  
 P 0.252369 -0.300695 1.167570  
 P 0.250194 -0.202292 -0.926645  
 P -0.124230 -0.044420 -0.990305  
 P -0.374993 0.049570 1.076067  
 P -0.499017 0.207500 1.064251  
 P -0.499610 0.296407 -1.070725  
 P -0.374996 0.453946 -1.075950  
 P 0.376032 0.051145 1.111372  
 P -0.250972 0.207503 1.064265  
 P -0.250378 0.296410 -1.070721  
 P 0.376181 0.454999 -1.090370  
 P -0.374994 -0.454119 1.047129  
 P 0.499953 -0.298043 1.071284  
 P 0.499572 -0.201186 -1.025515  
 P -0.374992 -0.044704 -1.030349  
 P 0.376644 -0.457297 1.035670



P -0.249940 -0.298049 1.071289  
P -0.249555 -0.201187 -1.025488  
P 0.374245 -0.044417 -0.990372  
S 0.125001 -0.041531 2.808914

### Energy parameters

|                     | AU/CELL             | EV/CELL              | KJ/MOL             |
|---------------------|---------------------|----------------------|--------------------|
| Electronic Energy : | -11320.356692462023 | -308042.566183339979 | -29721592.30752706 |
| Free Energy :       | -11320.326542904517 | -308041.745772171358 | -29721513.14987499 |

### Transition State [P<sub>32</sub>-O-SbMe<sub>3</sub>]<sub>TS</sub>

#### Structural parameters

CELL 13.4163 9.4247 1.0000 90.0000 90.0000 90.0033  
P 0.115609 0.172802 1.092018  
P -0.012498 0.326947 1.317213  
P -0.012388 0.427398 -1.050339  
P 0.111266 -0.416092 -1.068149  
P -0.140411 0.172907 1.078547  
P 0.237811 0.334237 1.080639  
P 0.236778 0.426657 -1.041338  
P -0.136042 -0.415996 -1.070073  
P 0.112597 -0.323878 1.061752  
P -0.012518 -0.166523 1.058702  
P -0.012309 -0.071598 -1.055454  
P 0.112438 0.086805 -1.040195  
P -0.137461 -0.324211 1.060098  
P 0.237238 -0.165358 1.071354  
P 0.237455 -0.072307 -1.045412  
P -0.137206 0.086599 -1.049898  
P -0.387944 0.177300 1.074109  
P 0.487616 0.335380 1.073406  
P 0.487572 0.427115 -1.041650  
P -0.386962 -0.415539 -1.043188  
P 0.363182 0.177300 1.075116  
P -0.262570 0.334200 1.076134  
P -0.261679 0.426885 -1.044382  
P 0.362027 -0.415682 -1.041977  
P -0.387329 -0.323075 1.071217  
P 0.487535 -0.165307 1.070906  
P 0.487549 -0.073297 -1.044970  
P -0.387621 0.084909 -1.041746  
P 0.362377 -0.323067 1.071979  
P -0.262018 -0.165637 1.068639  
P -0.262318 -0.072469 -1.047680  
P 0.362785 0.085027 -1.041271  
O -0.012676 0.314167 3.046212  
Sb -0.017341 0.155554 4.556365  
C 0.090084 -0.015028 4.766952

H 0.082873 -0.085214 3.911886  
 H 0.074854 -0.072034 5.691467  
 H 0.164726 0.029458 4.789278  
 C -0.006614 0.258962 6.482119  
 H -0.061152 0.344028 6.530605  
 H 0.067585 0.303414 6.600240  
 H -0.020856 0.182691 7.276491  
 C -0.157500 0.044388 4.752718  
 H -0.217820 0.121294 4.747892  
 H -0.157970 -0.014903 5.686910  
 H -0.166358 -0.026808 3.907458

**Imaginary Frequency -292.27 cm<sup>-1</sup>**

**Energy parameters**

|                     | AU/CELL             | EV/CELL              | KJ/MOL             |
|---------------------|---------------------|----------------------|--------------------|
| Electronic Energy : | -11357.384904620314 | -309050.155060995778 | -29818809.86484822 |
| Free Energy :       | -11357.261168689063 | -309046.788035130186 | -29818484.99620650 |

**Transition State [P<sub>32</sub>-S-SbMe<sub>3</sub>]<sub>TS</sub>**

**Structural parameters**

CELL 13.4088 9.4565 1.0000 90.0000 90.0000 89.9379  
 P 0.127855 0.025732 0.934897  
 P 0.000401 0.179771 0.908897  
 P 0.002787 0.267071 -1.227822  
 P 0.127313 0.425555 -1.222741  
 P -0.122913 0.018772 0.909165  
 P 0.254859 0.180695 0.901209  
 P 0.252651 0.268294 -1.232732  
 P -0.122919 0.424129 -1.261963  
 P 0.127414 -0.482483 0.896691  
 P 0.000847 -0.326987 0.903461  
 P 0.002589 -0.231374 -1.201439  
 P 0.127463 -0.074704 -1.170177  
 P -0.123137 -0.485062 0.853924  
 P 0.253298 -0.325876 0.907171  
 P 0.252447 -0.231391 -1.200108  
 P -0.122206 -0.073467 -1.209013  
 P -0.372450 0.018818 0.884423  
 P -0.497181 0.176658 0.880676  
 P -0.497452 0.267384 -1.245670  
 P -0.372544 0.424826 -1.252357  
 P 0.377889 0.019389 0.907669  
 P -0.247838 0.176456 0.875753  
 P -0.247829 0.266565 -1.250651  
 P 0.377883 0.425770 -1.254009  
 P -0.372550 -0.483024 0.866488

P -0.497544 -0.325594 0.878720  
 P -0.497800 -0.231157 -1.227878  
 P -0.372544 -0.074122 -1.227901  
 P 0.377994 -0.483711 0.864868  
 P -0.247376 -0.326320 0.878002  
 P -0.247126 -0.231212 -1.227118  
 P 0.377078 -0.073454 -1.208401  
 S 0.115912 -0.058645 3.092399  
 Sb 0.070128 -0.147240 5.488037  
 C -0.014429 -0.022165 6.916064  
 H 0.032294 0.061388 7.320037  
 H -0.040034 -0.089716 7.726221  
 H -0.078379 0.024936 6.418171  
 C -0.035487 -0.317475 5.224486  
 H -0.000498 -0.402277 4.659505  
 H -0.099167 -0.278616 4.660885  
 H -0.060197 -0.357538 6.188427  
 C 0.169831 -0.251330 6.895234  
 H 0.212830 -0.331841 6.376028  
 H 0.126512 -0.300227 7.689795  
 H 0.220729 -0.174201 7.322376

**Imaginary Frequency -191.7 and -26.5 cm<sup>-1</sup>**

**Energy parameters**

|                     | AU/CELL             | EV/CELL              | KJ/MOL             |
|---------------------|---------------------|----------------------|--------------------|
| Electronic Energy : | -11680.229129153166 | -317835.193033234915 | -30666437.25690686 |
| Free Energy :       | -11680.101829475991 | -317831.729032912583 | -30666103.03165153 |
